# Supplementary material for: Patterns, Consequences, and Possible Causes of Dropout in Upper Secondary Education in Mexico
Source: Hindawi journal article supplement (doi:10.1155/2015/676472), 2015-01-01
Supplement: f1 [file 676472.f1.zip]

Archive with 2 entries (2 files):
- mat.676472.v1.pdf
- mat.676472.v2.pdf
