# Supplementary material for: Patterns, Consequences, and Possible Causes of Dropout in Upper Secondary Education in Mexico
Source: Hindawi journal article supplement (doi:10.1155/2015/676472), 2015-01-01
Supplement: f1 [file 676472.f1.zip › mat.676472.v2.pdf]

## Appendix

**Table A1**

| Sample selection model for the estimation<br>of returns to education |             |            |
|----------------------------------------------------------------------|-------------|------------|
| Variable                                                             | Coefficient | Std. Error |
| Male dummy                                                           | 1.433       | 0.1622     |
| Age                                                                  | 0.147       | 0.0171     |
| Age squared                                                          | -0.003      | 0.0004     |
| Primary                                                              | 0.068       | 0.0549     |
| Secondary                                                            | 0.291       | 0.0432     |
| USE incomplete                                                       | 0.301       | 0.0486     |
| USE complete                                                         | 0.502       | 0.0525     |
| Higher Education                                                     | 1.020       | 0.0687     |
| Constant                                                             | 3.939       | 0.5564     |
| <i>Selection</i>                                                     |             |            |
| Male dummy                                                           | 0.65        | 0.0065     |
| Age                                                                  | 0.065       | 0.9913     |
| Age squared                                                          | -0.001      | 0.0001     |
| Primary                                                              | 0.073       | 0.0211     |
| Secondary                                                            | 0.149       | 0.0091     |
| USE incomplete                                                       | 0.185       | 0.0143     |
| USE complete                                                         | 0.133       | 0.0100     |
| Higher Education                                                     | 0.257       | 0.0105     |
| Constant                                                             | -0.911      | 0.0109     |
| Lamda                                                                | 2.688       | 0.4016     |
| Rho                                                                  | 1.000       |            |
| Sigma                                                                | 2.688       |            |
| No. Observations                                                     | 157526      |            |
| Censored obs                                                         | 77111       |            |
| Uncensored obs                                                       | 80415       |            |
| Wald chi2(8)                                                         | 1307.06     |            |
| Prob'chi2                                                            | 0.0000      |            |

Source: Author's estimation from the ENE 2013
